# Supplementary material for: Automated data analysis to rapidly derive and communicate ecological insights from satellite-tag data: A case study of reintroduced red kites
Source: Springer Nature journal article supplement (doi:10.1007/s13280-015-0711-3), 2015-10-27
Supplement: MOESM1 [file 15654404]

*Ambio*

Electronic supplementary material

**Title: Automated data analysis to rapidly derive and communicate ecological insights from satellite-tag data: A case study of reintroduced red kites**

Authors: René van der Wal, Cheng Zeng, Danny Heptinstall, Kapila Ponnampereuma, Chris Mellish, Stuart Ben, Advaith Siddharthan

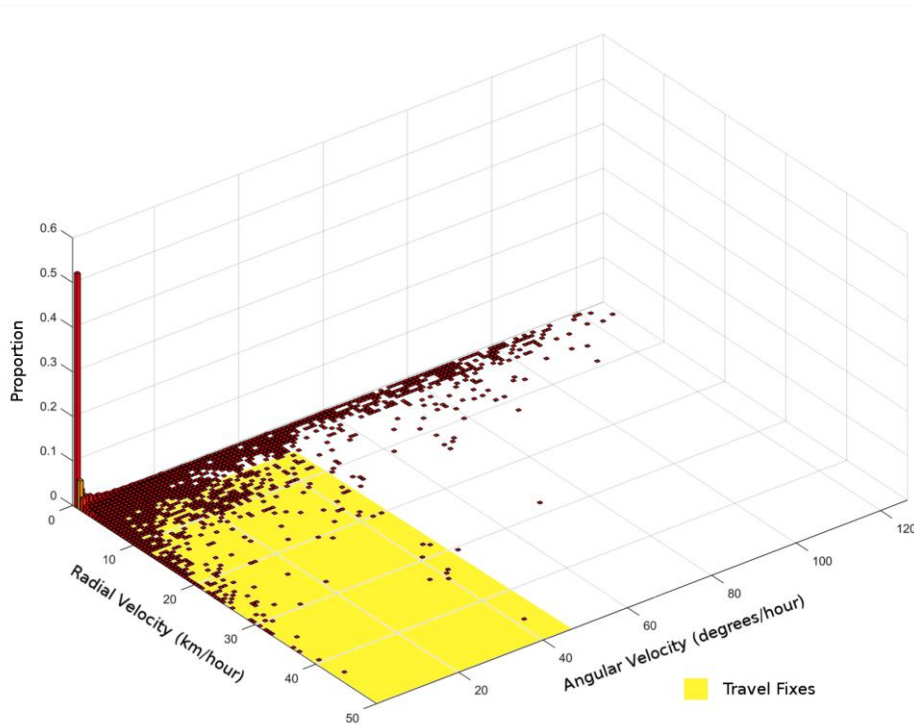

**Fig. S1** Frequency distribution of angular and radial velocity data across our sample of red kite satellite-tag data. The area in yellow delineates conditions in which angular velocity is sufficiently low ( $< 45^\circ/\text{hr}$ ), and radial velocity sufficiently high ( $> 5\text{km/hr}$ ), for location fixes to be categorised as ‘excursion fixes’. The data were calculated such that all 24 kites contributed equally to the proportions plotted.
